# Supplementary material for: Ethnobotany in the Cumbres de Monterrey National Park, Nuevo León, México
Source: J Ethnobiol Ethnomed. 2007 Jan 30;3:8. doi: 10.1186/1746-4269-3-8 (PMC1805743; doi:10.1186/1746-4269-3-8)
Supplement: Additional File 1 — Table 1. List of plant species used in the Cumbres de Monterrey National Park, Nuevo León, Mexico. [file 1746-4269-3-8-S1.pdf]

**Table 1. List of plant species used in the Cumbres de Monterrey National Park, Nuevo León, México.**

| Scientific name and voucher specimen number            | Common name       | Uses                                                                                                                                                                                                                | Parts used                                                                    | Method of use                                                                                                                                                                                                      |
|--------------------------------------------------------|-------------------|---------------------------------------------------------------------------------------------------------------------------------------------------------------------------------------------------------------------|-------------------------------------------------------------------------------|--------------------------------------------------------------------------------------------------------------------------------------------------------------------------------------------------------------------|
| ACERACEAE                                              |                   |                                                                                                                                                                                                                     |                                                                               |                                                                                                                                                                                                                    |
| <i>Acer negundo</i> L. (EE 15998)                      | Maple             | Ornamental<br>Firewood                                                                                                                                                                                              | Whole plant<br>Trunk and branches                                             | Planted in home gardens<br>Made into charcoal                                                                                                                                                                      |
| ADIANTACEAE                                            |                   |                                                                                                                                                                                                                     |                                                                               |                                                                                                                                                                                                                    |
| <i>Notholaena aschenborniana</i> Kl. (EE 16258)        | Helecho           | Abortive<br>Treatment to eliminate parasites (worms)                                                                                                                                                                | Leaves and roots                                                              | Ingestion of infusion                                                                                                                                                                                              |
| ACANTHACEAE                                            |                   |                                                                                                                                                                                                                     |                                                                               |                                                                                                                                                                                                                    |
| <i>Anisacanthus quadrifidus</i> Standl. (EE 16548)     | Anisacanto        | Ornamental                                                                                                                                                                                                          | Whole plant                                                                   | Planted in home gardens                                                                                                                                                                                            |
| AGAVACEAE                                              |                   |                                                                                                                                                                                                                     |                                                                               |                                                                                                                                                                                                                    |
| <i>Agave americana</i> L. (EE 16203)                   | Maguey            | Beverage                                                                                                                                                                                                            | Sap (aguamiel)                                                                | Mature plant is tapped for its sap                                                                                                                                                                                 |
| <i>Agave asperrima</i> Jacobi (EE 12750)               | Maguey            | Beverage<br><br>Alcoholic beverage (pulque)<br>Syrup<br>Food (quiote)                                                                                                                                               | Sap (aguamiel)<br><br>Sap<br>Sap<br>Inflorescence                             | Mature plant is tapped for its sap<br>Sap is fermented<br>Sap is boiled until thick<br>Baked in a pit oven                                                                                                         |
| <i>Agave bracteosa</i> S. Watson ex Engelm. (EE 12749) | Amole de Castilla | Treatment of internal traumatism/ renal problems,<br>and to detoxify the body<br>Treatment of diabetes<br>To restore receding hair<br>Beverage<br>Fermented beverages (pulque and mezcal)<br>Syrup<br>Food (quiote) | Roots<br><br>Roots<br>Roots<br>Sap (agua miel)<br>Sap<br>Sap<br>Inflorescence | Rubbed on the body /infusion<br><br>Ingestion of infusion<br>Rubbed on the hair<br>Plant is tapped for its sap<br>Sap is fermented<br>Sap is boiled for several hours<br>Baked in a pit oven, sweetened with sugar |
| <i>Agave lophantha</i> Schiede                         | Maguey            | Fiber                                                                                                                                                                                                               | Leaves                                                                        | Fiber is scraped from the                                                                                                                                                                                          |

|                                                                     |             |                                                                             |                                                                |                                                                                                                      |
|---------------------------------------------------------------------|-------------|-----------------------------------------------------------------------------|----------------------------------------------------------------|----------------------------------------------------------------------------------------------------------------------|
| (EE 16220)                                                          |             |                                                                             |                                                                | leaves                                                                                                               |
| <i>Agave scabra</i> Ortega (EE 16183)                               | Maguey      | Fodder                                                                      | Leaves, roots                                                  | Fed raw to animals                                                                                                   |
| <i>Agave victoriae-reginae</i> T. Moore (EE 12748)                  | Maguey      | Ornamental                                                                  | Whole plant                                                    | Planted in home gardens                                                                                              |
| <i>Manfreda maculosa</i> (Hook.) Rose (EE 16130)                    | Iris        | Ornamental                                                                  | Whole plant                                                    | Planted in home gardens                                                                                              |
| <i>Yucca carnerosana</i> (Trel.) McKelvey (EE 19639)                | Palma pita  | Food (chochas)<br>Live fences                                               | Flowers (removing the gynoecium and androecium)<br>Whole plant | Cooked with garlic and salt<br>Planted in a row                                                                      |
| <i>Yucca treculeana</i> Carrière (EE 16233)                         | Yuca        | Food (chochas)                                                              | Flowers (removing the gynoecium and androecium)                | Cooked with garlic and salt                                                                                          |
| AMARANTHACEAE                                                       |             |                                                                             |                                                                |                                                                                                                      |
| <i>Alternanthera caracasana</i> Kunth. (EE 16559)                   | Tianguis    | Remedy for fever, lowers high temperature                                   | Leaves                                                         | Ingestion of infusion with <i>Borago officinalis</i>                                                                 |
| <i>Amaranthus viridis</i> L. (EE 16200)                             | Quelite     | Food                                                                        | Tender leaves and stems                                        | Eaten raw or cooked                                                                                                  |
| ANACARDIACEAE                                                       |             |                                                                             |                                                                |                                                                                                                      |
| <i>Rhus virens</i> Lindh ex A. Gray (EE 16543)                      | Lantrisco   | Treatment of diabetes                                                       | Bark                                                           | Ingestion of infusion                                                                                                |
| APIACEAE                                                            |             |                                                                             |                                                                |                                                                                                                      |
| <i>Apium graveolens</i> L. (EE 16074)                               | Apio        | Flavoring herb and salad vegetable                                          | Leaves and stems                                               | Mixed with other vegetables                                                                                          |
| <i>Foeniculum vulgare</i> Mill. (EE 15993)                          | Hinojo      | Remedy for colic<br>Flavoring herb                                          | Leaves<br>Leaves                                               | Ingestion of infusion<br>Macerated                                                                                   |
| APOCYNACEAE                                                         |             |                                                                             |                                                                |                                                                                                                      |
| <i>Vinca major</i> L. (EE 15977)                                    | Teresita    | Ornamental                                                                  | Whole plant                                                    | Planted in home gardens                                                                                              |
| ASTERACEAE                                                          |             |                                                                             |                                                                |                                                                                                                      |
| <i>Achillea millefolium</i> L. (EE 16155)                           | Real de oro | Remedy for colic                                                            | Stems and leaves                                               | Ingestion of infusion                                                                                                |
| <i>Ageratina wrightii</i> (A. Gray) R. M. King & H. Rob. (EE 16021) | Ámbula      | Remedy for stomachaches and colic<br>Treatment of "fright" (a folk illness) | Leaves<br>Leaves, stems and flowers                            | Eaten raw or cooked, or taken as an infusion<br>The whole body is "cleansed" by gently brushing it with the plant on |

|                                                                   |                      |                                                                                                   |                                                                                 |                                                                                                                                                                |
|-------------------------------------------------------------------|----------------------|---------------------------------------------------------------------------------------------------|---------------------------------------------------------------------------------|----------------------------------------------------------------------------------------------------------------------------------------------------------------|
|                                                                   |                      | To increase the appetite of children                                                              | Leaves and stems                                                                | several successive days<br>Administered raw or in an infusion                                                                                                  |
| <i>Artemisia ludoviciana</i> Nutt. (EE 19011)                     | Estafiate            | Treatment of diabetes, indigestion, stomachaches and diarrhea                                     | Aerial parts                                                                    | Ingestion of infusion                                                                                                                                          |
| <i>Bidens odorata</i> Cav. (EE 16058)                             | Altamisa             | Treatment of menstrual hemorrhages<br><br>Abortive                                                | Leaves and flowers<br><br>Leaves and flowers                                    | Ingestion of infusion with <i>Ruta graveolens</i><br>Ingestion of infusion with <i>Ruta graveolens</i>                                                         |
| <i>Chrysactinia mexicana</i> A. Gray., (EE 16099)                 | Yerba de San Nicolás | Remedy for infertility<br><br>Control of urinary incontinence                                     | Leaves and stems<br><br>Leaves and stems                                        | Ingestion of infusion with <i>Vitis berlandieri</i> , taken orally and as a nocturnal shower<br>Ingestion of infusion                                          |
| <i>Chrysactinia truncata</i> S. Watson (EE 16478)                 | Yerba de San Nicolás | Remedy for infertility                                                                            | Leaves and stems                                                                | Ingestion of infusion with <i>Vitis berlandieri</i>                                                                                                            |
| <i>Chrysanthemum parthenium</i> (L.) Pers. (EE 16064)             | Altamisa             | Treatment of urinary problems, headaches and mouth ulcers                                         | Leaves and inflorescence                                                        | Ingestion of infusion                                                                                                                                          |
| <i>Ageratina viburnoides</i> (DC.) R.M. King & H. Rob. (EE 19348) | Yerba del burro      | Treatment of hemorrhages                                                                          | Leaves                                                                          | Ingestion of infusion with leaves of <i>Tagetes lucida</i>                                                                                                     |
| <i>Flourensia cernua</i> DC. (EE 16678)                           | Hojasé               | Control of parasites                                                                              | Leaves                                                                          | Ingestion of infusion                                                                                                                                          |
| <i>Gnaphalium semiamplexicaule</i> DC. (EE 16191)                 | Gordolobo            | Cough remedy<br>To alleviate cough with phlegm<br><br>Remedy for colic<br>Treatment of bronchitis | Leaves, stems and flowers<br>Leaves and stems<br><br>Leaves and stems<br>Leaves | Ingestion of infusion<br>Ingestion of infusion with bee honey<br>Ingestion of infusion<br>Ingestion of infusion with a piece of ocote ( <i>Pinus teocote</i> ) |
| <i>Gymnosperma glutinosum</i> Less. (EE 11283)                    | Tata Lencho          | Treatment of fractures and broken bones                                                           | Leaves                                                                          | Poultice with <i>Rosmarinus officinalis</i> and the root of <i>Wilcoxia poselgeri</i>                                                                          |
| <i>Machaeranthera scabrella</i> (Greene) Shinnars (JV 1252)       | Árnica               | Remedy for fatigue                                                                                | Flowers                                                                         | The body is massaged with the flowers mixed with the pulp of <i>Lophophora</i>                                                                                 |

|                                                   |                |                                                                                                                                                                                 |                                                                                                                                                  |                                                                                                                                                                                                                                                                                                                     |
|---------------------------------------------------|----------------|---------------------------------------------------------------------------------------------------------------------------------------------------------------------------------|--------------------------------------------------------------------------------------------------------------------------------------------------|---------------------------------------------------------------------------------------------------------------------------------------------------------------------------------------------------------------------------------------------------------------------------------------------------------------------|
|                                                   |                | <p>To treat insect bites and to wash wounds</p> <p>Treatment of stomach ulcers of diabetic patients<br/>Stomach infections<br/>Muscle pain</p> <p>Skin infections and warts</p> | <p>Flowers</p> <p>Leaves and flowers<br/>Leaves<br/>Leaves</p> <p>Leaves and flowers</p>                                                         | <p><i>williamsii</i> and one half of a <i>Persea americana</i> seed, fermented for 9 days in 99% alcohol<br/>Infusion with <i>Equisetum laevigatum</i> is applied on the skin<br/>Ingestion of infusion<br/>Ingestion of infusion<br/>Infusion applied with a cotton wad<br/>Infusion applied with a cotton wad</p> |
| <i>Matricaria recutita</i> L. (EE 16065)          | Manzanilla     | <p>Treatment of eye infections of infants</p> <p>Colic in infants</p> <p>Chills and catarrh</p> <p>Red eyes</p> <p>To alleviate and eliminate hematomas</p>                     | <p>Stem, leaves and flowers</p> <p>Leaves</p> <p>Leaves, stems and flowers</p> <p>Leaves, stems and flowers</p> <p>Leaves, stems and flowers</p> | <p>Infusion applied with a wad of cotton<br/>Infusion administered as nasal drops<br/>Infusion applied to the eyes with a cotton wad<br/>Infusion applied with a cotton wad<br/>Infusion applied to the wound with a cotton wad</p>                                                                                 |
| <i>Tagetes lucida</i> Cav. (EE 16098)             | Yerbanís       | <p>Hot beverage</p> <p>Treatment of scorpion stings</p> <p>Remedy for insomnia</p> <p>Congestion<br/>Intestinal cramps<br/>Antihelmintic</p>                                    | <p>Aerial parts<br/>Leaves, stems and flowers</p> <p>Leaves</p> <p>Leaves and flowers<br/>Leaves, stems and flowers<br/>Leaves</p>               | <p>Ingestion of infusion<br/>Ingestion of infusion with <i>Allium sativum</i><br/>Ingestion of infusion with <i>Citrus aurantium</i> (naranja) peel<br/>Ingestion of infusion<br/>Ingestion of infusion<br/>Ingestion of infusion</p>                                                                               |
| <i>Taraxacum officinale</i> (L.) Weber (EE 15953) | Diente de león | Treatment of pancreatitis                                                                                                                                                       | Roots                                                                                                                                            | Ground and boiled, ingested as an infusion                                                                                                                                                                                                                                                                          |
| BASELLACEAE                                       |                |                                                                                                                                                                                 |                                                                                                                                                  |                                                                                                                                                                                                                                                                                                                     |
| <i>Anredera versicaria</i> (Lam.)                 | Sacasil        | Treatment of fractures                                                                                                                                                          | Roots                                                                                                                                            | Poultice                                                                                                                                                                                                                                                                                                            |

|                                                           |                       |                                                          |                                     |                                                          |
|-----------------------------------------------------------|-----------------------|----------------------------------------------------------|-------------------------------------|----------------------------------------------------------|
| C.F. Gaertn. (EE 16158)                                   |                       | To clean bruises<br>To alleviate and eliminate hematomas | Roots<br>Sap of the roots           | Boiled with <i>Aloe vera</i><br>Applied on the hematoma  |
| BEGONIACEAE                                               |                       |                                                          |                                     |                                                          |
| <i>Begonia uniflora</i> S. Watson (IV 8683)               | Begonia               | Ornamental<br>Vomitive                                   | Whole plant<br>Roots                | Planted in home gardens<br>Ingestion of infusion         |
| BERBERIDACEAE                                             |                       |                                                          |                                     |                                                          |
| <i>Berberis gracilis</i> Hartw. ex Benth. (EE 16322)      | Palo amarillo, cuasia | Treatment of renal problems<br>Fly repellent             | Bark<br>Bark, leaves and stems      | Ingestion of infusion<br>Boiled; infusion is sprayed     |
| BETULACEAE                                                |                       |                                                          |                                     |                                                          |
| <i>Carpinus caroliniana</i> Walter (EE 16460)             | Olmo                  | Ornamental                                               | Whole plant                         | Planted in home gardens                                  |
| BIGNONIACEAE                                              |                       |                                                          |                                     |                                                          |
| <i>Chilopsis linearis</i> Sweet (EE 16151)                | Mimbres               | Cough remedy<br>Heart ailments                           | Flowers<br>Flowers                  | Ingestion of infusion<br>Ingestion of infusion           |
| <i>Tecoma stans</i> (L.) Kunth (EE 16123)                 | Tronadora             | Treatment of diabetes                                    | Leaves, stems and flowers           | Ingestion of infusion                                    |
| BORAGINACEAE                                              |                       |                                                          |                                     |                                                          |
| <i>Borago officinalis</i> L. (EE 19081)                   | Borraja               | Febrifuge                                                | Leaves                              | Ingestion of infusion                                    |
| BRASSICACEAE                                              |                       |                                                          |                                     |                                                          |
| <i>Lepidium virginicum</i> L. (EE 16430)                  | Lentejuela            | Treatment of amoebic dysentery                           | Whole plant                         | Ingestion of infusion in milk                            |
| <i>Rorippa nasturtium-aquaticum</i> (L.) Hayek (EE 16539) | Berro                 | Food                                                     | Leaves                              | Eaten raw in salads and cooked with eggs                 |
| BROMELIACEAE                                              |                       |                                                          |                                     |                                                          |
| <i>Tillandsia recurvata</i> L. (EE 19316)                 | Lirio                 | Food                                                     | Tender stems                        | Eaten raw                                                |
| <i>Tillandsia usneoides</i> L., (EE 19335)                | Paixtle               | Remedy for hemorrhoids<br>Decoration                     | Whole plant<br>Whole plant          | Ingestion of infusion<br>Spread below the Christmas tree |
| BUDDLEJACEAE                                              |                       |                                                          |                                     |                                                          |
| <i>Buddleja cordata</i> Kunth (EE 16754)                  | Tepozán               | Remedy for headaches<br>Body aches                       | Leaves<br>Leaves, stems and flowers | Ingestion of infusion<br>Ingestion of infusion           |
| CACTACEAE                                                 |                       |                                                          |                                     |                                                          |

|                                                                                                                   |               |                                                        |                              |                                                                                                        |
|-------------------------------------------------------------------------------------------------------------------|---------------|--------------------------------------------------------|------------------------------|--------------------------------------------------------------------------------------------------------|
| <i>Ariocarpus retusus</i> Scheidw. (MGB 233)                                                                      | Chaute        | Treatment of body aches and rheumatism                 | Whole plant                  | Eaten or ingested as an infusion                                                                       |
| <i>Astrophytum capricorne</i> Britton & Rose (MGB 256)                                                            | Anzuelo       | Ornamental                                             | Whole plant                  | Planted in home gardens                                                                                |
| <i>Cylindropuntia leptocaulis</i> (DC.) F.M. Knuth (MGB 341)                                                      | Tasajillo     | Treatment of diabetes                                  | Parenchyma                   | Blended into a beverage with orange juice                                                              |
| <i>Echinocactus horizonthalonius</i> Lemaire, (MGB 411)                                                           | Manca caballo | Ornamental                                             | Whole plant                  | Planted in home gardens                                                                                |
| <i>Echinocactus platyacanthus</i> Link & Otto, (MGB 178)                                                          | Biznaga burra | Candy<br><br>Fodder and drink for domesticated animals | Pulp of the stem<br><br>Pulp | Cut in pieces, allowed to dry for 2 days and cooked with sugar<br>Cut in slices and fed raw to animals |
| <i>Echinocereus dasyacanthus</i> Engelm. (MGB 294)                                                                | Pitaya        | Ornamental                                             | Entire plant                 | Planted in home gardens                                                                                |
| <i>Echinocereus knippelianus</i> Liebm. (EE 13245)                                                                | Peyote        | Treatment of bruises and body aches                    | Parenchyma                   | Rubbed on afflicted parts                                                                              |
| <i>Echinocereus pectinatus</i> Engelm. (MGB 265)                                                                  | Pitaya        | Food                                                   | Fruit                        | Eaten raw                                                                                              |
| <i>Echinocereus reichenbachii</i> (Terscheck) Britton & Rose ssp. <i>armatus</i> (Poselg.) N.P. Taylor (EE 19628) | Pitaya        | Food                                                   | Fruit                        | Eaten raw                                                                                              |
| <i>Echinocereus stramineus</i> Engelm. ex Ruempl. (EE 19632)                                                      | Pitaya        | Food                                                   | Fruit                        | Eaten raw                                                                                              |
| <i>Escobaria tuberculosa</i> (Engelm.) Britton & Rose (MGB 373)                                                   | Chilitos      | Ornamental                                             | Whole plant                  | Planted in home gardens                                                                                |
| <i>Ferocactus hamatacanthus</i> (Muhlenpf.) Britton & Rose (EE 19629)                                             | Anzuelo       | Ornamental<br>Food                                     | Entire plant<br>Parenchyma   | Planted in home gardens<br>Cooked and sweetened                                                        |
| <i>Ferocactus pilosus</i> (Galeotti ex Salm-Dyck) Werderm.                                                        | Biznaga roja  | Ornamental<br>Food                                     | Entire plant<br>Fruit        | Planted in home gardens<br>Eaten raw                                                                   |

|                                                                                                        |                   |                                                                                        |                                                                         |                                                                                                                                                                                                                                   |
|--------------------------------------------------------------------------------------------------------|-------------------|----------------------------------------------------------------------------------------|-------------------------------------------------------------------------|-----------------------------------------------------------------------------------------------------------------------------------------------------------------------------------------------------------------------------------|
| (EE 19505)                                                                                             |                   |                                                                                        |                                                                         |                                                                                                                                                                                                                                   |
| <i>Lophophora williamsii</i><br>(Lem. ex Salm-Dyck) J.M.<br>Coul. (recorded preserved<br>in alcohol)   | Peyote            | Remedy for fatigue<br>Treatment of concussions<br>Rheumatism                           | Stems<br>Stems seeped in alcohol<br>Stems seeped in alcohol             | Eaten raw<br>Rubbed on the muscles<br>Rubbed on the afflicted area                                                                                                                                                                |
| <i>Mammillaria chionocephala</i><br>J.A. Purpus (EE 19625)                                             | Chilitos          | Ornamental                                                                             | Entire plant                                                            | Planted in home gardens                                                                                                                                                                                                           |
| <i>Mammillaria heyderi</i><br>Muehlenpf. ssp.<br><i>hemisphaerica</i> (Engelm.)<br>D.R. Hunt (MGB 286) | Chilitos          | Ornamental                                                                             | Entire plant                                                            | Planted in home gardens                                                                                                                                                                                                           |
| <i>Mammillaria heyderi</i><br>Muehlen. ssp. <i>heyderi</i><br>(MGB 311)                                | Chilitos          | Ornamental                                                                             | Entire plant                                                            | Planted in home gardens                                                                                                                                                                                                           |
| <i>Mammillaria pottsii</i> Scheer<br>ex Salm-Dyck (MGB 378)                                            | Chilitos          | Ornamental                                                                             | Entire plant                                                            | Planted in home gardens                                                                                                                                                                                                           |
| <i>Mammillaria prolifera</i> ssp.<br><i>texana</i> (Engelm.) Borg (EE<br>19627)                        | Chilitos          | Ornamental                                                                             | Entire plant                                                            | Planted in home gardens                                                                                                                                                                                                           |
| <i>Opuntia engelmannii</i> Salm-<br>Dyck (EE 19618)                                                    | Nopal             | Treatment of diabetes<br><br>Fodder                                                    | Stems<br><br>Stems                                                      | Blended as a beverage with<br>orange and lime juice, after<br>prickles are singed off<br>Fed raw to animals                                                                                                                       |
| <i>Opuntia ficus-indica</i> (L.)<br>Mill. (EE 19633)                                                   | Nopal de Castilla | Glucose control<br><br>Treatment of diabetes<br><br>Fodder<br><br>Food<br>Food (tunas) | Parenchyma of the stems<br><br>Roots<br><br>Stems<br><br>Stems<br>Fruit | Blended as a beverage with<br>orange and lime juice<br>Blended with the roots of<br><i>Ricinus communis</i> and<br>ingested<br>Fed raw to animals after<br>prickles are singed off<br>Cooked<br>Boiled with sugar or eaten<br>raw |
| <i>Opuntia imbricata</i> (Haw.)<br>DC. Knuth. (EE 19619)                                               | Coyonoxtle        | Food                                                                                   | Fruit                                                                   | Eaten raw (sour prickly pear)                                                                                                                                                                                                     |

|                                                                             |                 |                                                                                                       |                                                                                |                                                                                                                                                                                                                                        |
|-----------------------------------------------------------------------------|-----------------|-------------------------------------------------------------------------------------------------------|--------------------------------------------------------------------------------|----------------------------------------------------------------------------------------------------------------------------------------------------------------------------------------------------------------------------------------|
| <i>Opuntia phaeacantha</i><br>Engelm. (EE 19639)                            | Nopal           | Fodder                                                                                                | Stems                                                                          | Fed raw to animals after prickles are singed off                                                                                                                                                                                       |
| <i>Opuntia stenopetala</i><br>Engelm. (EE 19617)                            | Nopal           | Glucose control<br><br>Treatment of diabetes<br><br>Fodder<br><br>Food<br>Food (tunas)<br>Canned food | Stems<br><br>Roots<br><br>Roots and stems<br><br>Stems<br>Fresh fruit<br>Fruit | Blended as a beverage with orange and lime juice<br>Blended with the roots of <i>Ricinus communis</i> and ingested<br>Stems and roots are fed raw to animals after prickles are singed off<br>Cooked<br>Eaten raw<br>Boiled with sugar |
| <i>Sclerocactus scheeri</i> (Salm-Diuyck) N.P. Taylor (EE 16523)            | Biznaga         | Ornamental                                                                                            | Entire plant                                                                   | Planted in home gardens                                                                                                                                                                                                                |
| <i>Selenicereus spinulosus</i><br>Britton & Rose (EE 16522)                 |                 | Food<br>Ornamental                                                                                    | Fruit<br>Entire plant                                                          | Eaten raw<br>Planted in home gardens                                                                                                                                                                                                   |
| CAESALPINIACEAE                                                             |                 |                                                                                                       |                                                                                |                                                                                                                                                                                                                                        |
| <i>Bauhinia macranthera</i><br>Benth. ex Hemsl. (EE 13319)                  | Pata de vaca    | Ornamental                                                                                            | Whole plant                                                                    | Planted in home gardens                                                                                                                                                                                                                |
| <i>Caesalpinia mexicana</i> A. Gray (EE 13316)                              | Yerba del potro | Ornamental<br>Useful wood                                                                             | Whole plant<br>Stems and branches                                              | Planted in home gardens<br>Handicrafts, hand tools                                                                                                                                                                                     |
| <i>Cercis canadensis</i> L. var. <i>mexicana</i> (Rose) M. Hopk. (EE 19301) | Duraznillo      | Ornamental                                                                                            | Whole plant                                                                    | Planted in home gardens                                                                                                                                                                                                                |
| <i>Parkinsonia aculeata</i> L. (EE 16569)                                   | Retama          | Construction material<br>Ornamental<br>Fodder                                                         | Stems and branches<br>Whole plant<br>Leaves                                    | To build fences<br>Planted in home gardens<br>Fed raw to animals                                                                                                                                                                       |
| <i>Pomaria canescens</i> (Fisher) B.B.Simpson (EE 18476)                    | Chancaca        | To alleviate the pain of hemorrhoids<br>Diabetes                                                      | Leaves<br>Leaves                                                               | Ingestion of infusion<br>Ingestion of infusion                                                                                                                                                                                         |
| <i>Pomaria melanosticta</i> S. Schauer (EE 19302)                           | Chancaca        | Treatment of hemorrhoids                                                                              | Leaves                                                                         | Ingestion of infusion                                                                                                                                                                                                                  |
| CANNABACEAE                                                                 |                 |                                                                                                       |                                                                                |                                                                                                                                                                                                                                        |
| <i>Cannabis sativa</i> ssp. <i>indica</i>                                   | Marihuana       | Treatment of glaucoma                                                                                 | Leaves                                                                         | Infusion used as eye drops                                                                                                                                                                                                             |

|                                                               |                 |                                                                                                                |                                                                                                                                                                    |                                                                                            |
|---------------------------------------------------------------|-----------------|----------------------------------------------------------------------------------------------------------------|--------------------------------------------------------------------------------------------------------------------------------------------------------------------|--------------------------------------------------------------------------------------------|
| (Lam) E. Small & A. Cronquist (recorded preserved in alcohol) |                 | Remedy for fatigue<br><br>Arthritis                                                                            | Leaves (with flowers of <i>Machaeranthera scabrella</i> and leaves of <i>Bidens odorata</i> , immersed in 99% alcohol, fermented for 9 days)<br>Leaves and flowers | Rubbed on the body<br><br>Massaged on afflicted parts                                      |
| CAPRIFOLIACEAE                                                |                 |                                                                                                                |                                                                                                                                                                    |                                                                                            |
| <i>Lonicera pilosa</i> Willd. ex Kunth (EE 16344)             | Madreselva      | Ornamental                                                                                                     | Whole plant                                                                                                                                                        | Planted in home gardens                                                                    |
| <i>Sambucus mexicana</i> DC. (EE 17243)                       | Sauco           | Treatment after childbirth<br>Ornamental                                                                       | Branches<br>Whole plant                                                                                                                                            | Vaginal washings<br>Planted in home gardens                                                |
| CHENOPODIACEAE                                                |                 |                                                                                                                |                                                                                                                                                                    |                                                                                            |
| <i>Chenopodium berlandieri</i> Moq. (EE 18935)                | Epazote         | Treatment of blood infections<br><br>Remedy for asthma and constipation<br>Intestinal parasites                | Leaves (with <i>Artemisia mexicana</i> and <i>Lippia graveolens</i> )<br>Leaves<br>Leaves (with leaves of <i>Mentha spicata</i> or milk)                           | Ingestion of infusion<br><br>Nasal drops<br>Ingestion of infusion                          |
| <i>Chenopodium incisum</i> Poir. (EE 16554)                   | Epazote         | Treatment of blood infections<br><br>Remedy for asthma and constipation                                        | Leaves (with <i>Artemisia mexicana</i> and <i>Lippia graveolens</i> )<br>Leaves                                                                                    | Ingestion of infusion<br><br>Nasal drops                                                   |
| <i>Chenopodium murale</i> L. (EE 16286)                       | Epazote de olor | Treatment of blood infections<br><br>Remedy for asthma and constipation<br>Flavoring herb                      | Leaves (with <i>Artemisia mexicana</i> and <i>Lippia graveolens</i> )<br>Leaves<br>Leaves (cooked with <i>Phaseolus vulgaris</i> )                                 | Ingestion of infusion<br><br>Nasal drops<br>Salads, soups                                  |
| <i>Teloxys ambrosioides</i> (L.) W.A. Weber (EE 16072).       | Epazote         | Treatment of blood infections<br><br>Remedy for asthma and constipation<br>Antihelmintic<br><br>Flavoring herb | Leaves (with <i>Artemisia mexicana</i> and <i>Lippia graveolens</i> )<br>Leaves<br>Leaves (with leaves of <i>Mentha spicata</i> or milk)<br>Leaves                 | Ingestion of infusion<br><br>Nasal drops<br>Ingestion of infusion<br><br>Cooked with beans |

|                                                                         |                              |                                                                               |                           |                                                                                                                                                                      |
|-------------------------------------------------------------------------|------------------------------|-------------------------------------------------------------------------------|---------------------------|----------------------------------------------------------------------------------------------------------------------------------------------------------------------|
| COMMELINACEAE                                                           |                              |                                                                               |                           |                                                                                                                                                                      |
| <i>Commelina dianthifolia</i> Delile (EE 14839)                         | Yerba de la gallina          | To alleviate pain after childbirth                                            | Whole plant               | Ingestión of infusion                                                                                                                                                |
| <i>Commelina erecta</i> L. (EE 16243)                                   | Yerba de la gallina          | To stop bleeding<br>Ornamental                                                | Leaves<br>Whole plant     | Ingestion of infusion<br>Planted in home gardens                                                                                                                     |
| <i>Gibasis pellucida</i> (M. Martens. & Galeotti.) D.R. Hunt (EE 16296) | Yerba de la gallina          | Ornamental                                                                    | Whole plant               | Planted in home gardens                                                                                                                                              |
| <i>Tradescantia brevifolia</i> (Torr.) Rose (EE 13336)                  | Verbena, yerba de la gallina | Febrifuge                                                                     | Leaves, stems and flowers | Ingestion of infusión                                                                                                                                                |
| <i>Tradescantia pringlei</i> S. Watson (EE 16781)                       | Yerba de la gallina          | Febrifuge                                                                     | Leaves, stems and flowers | Ingestión of infusión                                                                                                                                                |
| CONVOLVULACEAE                                                          |                              |                                                                               |                           |                                                                                                                                                                      |
| <i>Ipomoea pubescens</i> Lam. (EE 14840)                                | Correhuela                   | Ornamental                                                                    | Whole plant               | Planted in home gardens                                                                                                                                              |
| CORNACEAE                                                               |                              |                                                                               |                           |                                                                                                                                                                      |
| <i>Cornus florida</i> L. (EE 15403)                                     | Palo casita                  | Black dye                                                                     | Bark                      | Boiled in water                                                                                                                                                      |
| CRASSULACEAE                                                            |                              |                                                                               |                           |                                                                                                                                                                      |
| <i>Echeveria strictiflora</i> A. Gray, (EE 13358)                       | Siempre viva                 | Ornamental                                                                    | Whole plant               | Planted in home gardens                                                                                                                                              |
| <i>Kalanchoe daigremontiana</i> Hamet & Perrier (EE 16704)              | Kalanchoe                    | Anti-inflammatory                                                             | Leaves                    | Poultice                                                                                                                                                             |
| <i>Sedum greggii</i> Hemzl. (EE 16344)                                  | Siempre viva                 | Ornamental                                                                    | Whole plant               | Planted in home gardens                                                                                                                                              |
| <i>Sedum madrense</i> S. Watson (EE 16722)                              | Siempre viva                 | Treatment of fungal infections of the mouth<br>To remove debris from the eyes | Leaves<br>Leaves          | Pulp is rubbed on afflicted area<br>Viscous juice squeezed out of the leaves is used to wash the cornea (debris adheres to the liquid and is drained out of the eye) |
| <i>Sedum moranense</i> Kunth (EE 12587)                                 | Siempre viva                 | Ornamental                                                                    | Whole plant               | Planted in home gardens                                                                                                                                              |
| <i>Sedum palmeri</i> S. Watson                                          | Siempre viva                 | Ornamental                                                                    | Whole plant               | Planted in home gardens                                                                                                                                              |

|                                                   |                  |                                                                                           |                                                                                                        |                                                                                                                                                                                  |
|---------------------------------------------------|------------------|-------------------------------------------------------------------------------------------|--------------------------------------------------------------------------------------------------------|----------------------------------------------------------------------------------------------------------------------------------------------------------------------------------|
| (EE 13299)                                        |                  |                                                                                           |                                                                                                        |                                                                                                                                                                                  |
| <i>Sedum papillicaulum</i> G.L. Nesom (EE 16519)  | Siempre viva     | Ornamental                                                                                | Whole plant                                                                                            | Planted in home gardens                                                                                                                                                          |
| <i>Sedum praealtum</i> A. DC. (EE 16027)          | Siempre viva     | Ornamental                                                                                | Whole plant                                                                                            | Planted in home gardens                                                                                                                                                          |
| CUCURBITACEAE                                     |                  |                                                                                           |                                                                                                        |                                                                                                                                                                                  |
| <i>Cucurbita ficifolia</i> C.D. Bouché (EE 16396) | Chilacayote      | Sweets                                                                                    | Fruit                                                                                                  | Cut in pieces and seeped with water and lime (calcium oxide) for 12 hours, then rinsed clean and boiled in water with 2-3 kg of sugar and apple ( <i>Malus domestica</i> ) twigs |
| <i>Cucurbita foetidissima</i> Kunth (EE 16398)    | Calabacilla loca | Shampoo<br>Food                                                                           | Fruit pulp<br>Flowers                                                                                  | Hair wash<br>Cooked with cheese                                                                                                                                                  |
| <i>Cucurbita</i> sp. (EE 16943)                   | Calabacilla      | Detergent                                                                                 | Fruit                                                                                                  | Boiled and used as soap                                                                                                                                                          |
| <i>Sechium edule</i> (Jacq.) Sw. (EE 18967)       | Chayote          | Food                                                                                      | Fruit                                                                                                  | Eaten cooked, in salads or soup                                                                                                                                                  |
| CUPRESSACEAE                                      |                  |                                                                                           |                                                                                                        |                                                                                                                                                                                  |
| <i>Cupressus arizonica</i> Greene (EE 11809)      | Cedro            | Remedy for stomachaches<br><br>To control flatulence<br>Firewood<br>Construction material | Bark and leaves (with <i>Bidens odorata</i> )<br>Bark and leaves<br>Trunk, branches<br>Trunk, branches | Ingestion of infusion<br><br>Ingestion of infusion<br>Burnt in kitchen fires<br>Fences; beams and rafters for house roofs                                                        |
| <i>Juniperus deppeana</i> Steud. (EE 11282)       | Táscate          | Firewood<br>Construction material                                                         | Trunk and branches<br>Trunk and branches                                                               | Burnt in ovens<br>Fences, beams and rafters for house roofs                                                                                                                      |
| <i>Juniperus flaccida</i> Schltdl. (EE 12741)     | Táscate          | Firewood<br>Construction material                                                         | Trunk and branches<br>Trunk and branches                                                               | Burnt in ovens<br>Fences, beams and rafters for house roofs                                                                                                                      |
| EBENACEAE                                         |                  |                                                                                           |                                                                                                        |                                                                                                                                                                                  |
| <i>Diospyros texana</i> Scheele (EE 16252)        | Chapote          | Treatment of diabetes                                                                     | Leaves                                                                                                 | Ingestion of infusion                                                                                                                                                            |
| EQUISETACEAE                                      |                  |                                                                                           |                                                                                                        |                                                                                                                                                                                  |
| <i>Equisetum laevigatum</i> A.                    | Cola de caballo  | Remedy for renal ailments                                                                 | Stems                                                                                                  | Ingestion of infusion                                                                                                                                                            |

|                                                                                                 |                        |                                                           |                                                                                                                    |                                                                                    |
|-------------------------------------------------------------------------------------------------|------------------------|-----------------------------------------------------------|--------------------------------------------------------------------------------------------------------------------|------------------------------------------------------------------------------------|
| Br. (EE 16079)                                                                                  |                        | Prostate problems                                         | Stems (with <i>Zea mays</i> flowers) styles, called "corn hairs," and the calyx of <i>Physalys staphelioides</i> ) | Ingestion of infusion                                                              |
| ERICACEAE                                                                                       |                        |                                                           |                                                                                                                    |                                                                                    |
| <i>Arbutus xalapensis</i> Kunth. (EE 14791)                                                     | Madroño                | Mouth wash                                                | Fruit                                                                                                              | Chewed raw                                                                         |
| EUPHORBIACEAE                                                                                   |                        |                                                           |                                                                                                                    |                                                                                    |
| <i>Acalypha lindheimeri</i> Mull. Arg. (EE 16080)                                               | Yerba del cáncer       | To wash wounds<br>To alleviate the pain due to traumatism | Leaves<br>Stems and leaves                                                                                         | Infusion applied to wound<br>Ingestion of infusion                                 |
| <i>Acalypha monostachya</i> Cav. (EE 15966)                                                     | Yerba del cáncer       | To wash wounds<br>To alleviate the pain due to traumatism | Leaves<br>Stems and leaves                                                                                         | Infusion applied to wound<br>Ingestion of infusion                                 |
| <i>Croton torreyanus</i> Mull. Arg. (EE 16553)                                                  | Salvia                 | Treatment of anemia                                       | Leaves (with <i>Salvia regla</i> or <i>Salvia greggii</i> )                                                        | Ingestion of infusion                                                              |
| <i>Euphorbia astyla</i> Engelm. ex Boiss. (EE 16750)                                            | Golondrina             | Remedy for hemorrhoids                                    | Leaves                                                                                                             | Ingestion of infusion                                                              |
| <i>Euphorbia dentata</i> Michx. (EE 16564)                                                      | Golondrina             | Dandruff                                                  | Leaves and stems                                                                                                   | Hair washed with a decoction two or three times a week                             |
| <i>Euphorbia fendleri</i> (Torr. & A. Gray (EE 16678)                                           | Golondrina             | Hemorrhoids                                               | Leaves                                                                                                             | Ingestion of infusion                                                              |
| <i>Euphorbia graminea</i> Jacq. (IV 8588)                                                       | Golondrina             | Hemorrhoids                                               | Leaves                                                                                                             | Ingestion of infusion                                                              |
| <i>Euphorbia hyssopifolia</i> L. (EE 16693)                                                     | Yerba de la golondrina | Hemorrhoids<br>Treatment of acne                          | Leaves<br>Stems and leaves                                                                                         | Ingestion of infusion<br>Face washed with an infusion twice a week                 |
| <i>Tragia ramosa</i> Torr. (EE 18921)                                                           | Ortiguilla             | Remedy for the flu and constipation<br>Headaches          | Stems<br>Leaves                                                                                                    | Ingestion of infusion<br>A raw leaf is placed on the skin on each side of the head |
| FABACEAE                                                                                        |                        |                                                           |                                                                                                                    |                                                                                    |
| <i>Canavalia villosa</i> Benth. (EE 19921)                                                      | Frijol silvestre       | Fodder                                                    | Leaves                                                                                                             | Fed raw to animals                                                                 |
| <i>Dalea bicolor</i> Humb. & Bonpl. ex Willd. var. <i>argyraea</i> (A. Gray) Barneby (EE 16146) | Engorda cabras         | Fodder                                                    | Leaves                                                                                                             | Fed raw to animals                                                                 |

|                                                       |                  |                                                                |                                                    |                                                                      |
|-------------------------------------------------------|------------------|----------------------------------------------------------------|----------------------------------------------------|----------------------------------------------------------------------|
| <i>Desmodium grahamii</i> A. Gray (EE 16228)          | Pegajosa         | Fodder                                                         | Whole plant                                        | Fed raw to animals                                                   |
| <i>Eysenhardtia texana</i> Scheele (EE 13325)         | Vara dulce       | Fodder<br>Treatment of renal diseases<br>Diuretic              | Leaves and flowers<br>Leaves<br>Stems and flowers  | Fed raw to animals<br>Ingestion of infusion<br>Ingestion of infusion |
| <i>Indigofera suffruticosa</i> Mill. (EE 13330)       | Palo azul        | Beverage<br>Remedy for renal problems<br>Dye                   | Bark<br>Bark<br>Aerial parts                       | Ingestion of infusion<br>Ingestion of infusion<br>Boiled in water    |
| <i>Lupinus caballoanus</i> B. L. Turner (EE 14682)    | Frijolillo       | Ornamental                                                     | Whole plant                                        | Planted in home gardens                                              |
| <i>Medicago sativa</i> L. (EE 14872)                  | Alfalfa          | Fodder                                                         | Whole plant                                        | Fed raw to animals                                                   |
| <i>Pisum sativum</i> L. (EE 16068)                    | Chícharo         | Food                                                           | Seeds                                              | Boiled in soups                                                      |
| <i>Securigera varia</i> (L.) P. Lassen (EE 14666)     | Coronilla        | Ornamental                                                     | Whole plant                                        | Planted in home gardens                                              |
| <i>Vicia villosa</i> Roth (EE 16087)                  | Frijol           | Fodder                                                         | Whole plant                                        | Fed raw to animals                                                   |
| <i>Vigna populnea</i> Piper (EE 16654)                | Frijol silvestre | Food<br>Fodder                                                 | Seeds<br>Whole plant                               | Boiled<br>Fed raw to animals                                         |
| FAGACEAE                                              |                  |                                                                |                                                    |                                                                      |
| <i>Quercus canbyi</i> Trel. (EE 12729)                | Encino           | Fodder<br>Construction material<br>Firewood                    | Acorns<br>Trunk and branches<br>Trunk and branches | Fed raw to animals<br>To build fences and roofs                      |
| <i>Quercus coccolobaefolia</i> Trel. (EE 15416)       | Encino           | Fodder<br>Firewood                                             | Acorns<br>Trunk and branches                       | Fed raw to animals                                                   |
| <i>Quercus greggii</i> Trel. (EE 16380)               | Encino           | Fodder                                                         | Acorns                                             | Fed raw to animals                                                   |
| <i>Quercus mexicana</i> Humb. & Bonpl. (EE 16303)     | Encino           | Fodder<br>Firewood                                             | Acorns<br>Trunk and branches                       | Fed raw to animals                                                   |
| <i>Quercus polymorpha</i> Schltdl. & Cham. (EE 13371) | Encino           | Treatment of sensitive gums<br>Remedy for edginess<br>Firewood | Bark<br>Inflorescences<br>Trunk and branches       | Mouthwash<br>Ingestion of infusion                                   |
| <i>Quercus rysophylla</i> Weatherby (EE 13309)        | Encino           | Fodder<br>Firewood                                             | Acorns                                             | Fed raw to animals                                                   |
| GARRYACEAE                                            |                  |                                                                |                                                    |                                                                      |

|                                                         |                      |                                                                  |                                                                       |                                                                                                     |
|---------------------------------------------------------|----------------------|------------------------------------------------------------------|-----------------------------------------------------------------------|-----------------------------------------------------------------------------------------------------|
| <i>Garria ovata</i> Benth. (EE 12724)                   | Garria               | Treatment of chronic diarrhea                                    | Leaves                                                                | Ingestion of infusion                                                                               |
| GERANIACEAE                                             |                      |                                                                  |                                                                       |                                                                                                     |
| <i>Geranium seemanni</i> Peyr.A.M. (EE 11308)           | Geranio, Alfilerillo | Remedy for colic<br>Treatment of throat infections<br>Headaches  | Leaves<br>Leaves and stems<br>Leaves (with oil and coffee)            | Ingestion of infusion<br>Ingestion of infusion<br>Each side of the head is massaged with a raw leaf |
| <i>Pelargonium odoratissimum</i> Soland. (EE 16604)     | Geranio de olor      | Remedy for colic                                                 | Leaves                                                                | Ingestion of infusion                                                                               |
| HYDRANGEACEAE                                           |                      |                                                                  |                                                                       |                                                                                                     |
| <i>Philadelphus madrensis</i> Hemsl. (EE 16112)         |                      | Ornamental                                                       | Whole plant                                                           | Planted in home gardens                                                                             |
| JUGLANDACEAE                                            |                      |                                                                  |                                                                       |                                                                                                     |
| <i>Carya myristicaeformis</i> Nutt. (EE 16182)          | Nogal cimarrón       | Treatment of diabetes<br>Remedy for hair loss<br><br>Colic       | Bark<br>Immature fruits<br><br>Leaves                                 | Ingestion of infusion<br>Head is washed with a decoction<br>Ingestion of infusion                   |
| <i>Carya ovata</i> K. Koch (EE 16531).                  | Nogal                | Treatment of diabetes<br>Remedy for hair loss<br><br>Colic       | Bark<br>Immature fruits<br><br>Leaves                                 | Ingestion of infusion<br>Head is washed with a decoction<br>Ingestion of infusion                   |
| <i>Juglans major</i> (Torr.) A. Heller (EE 16471)       | Nogal                | Treatment of diabetes<br>Remedy for hair loss                    | Bark<br>Immature fruits                                               | Ingestion of infusion<br>Head is washed with a decoction                                            |
| LAMIACEAE                                               |                      |                                                                  |                                                                       |                                                                                                     |
| <i>Agastache palmeri</i> (B.L. Rob.) Standl. (EE 16055) | Poleo                | Ornamental                                                       | Whole plant                                                           | Planted in home gardens                                                                             |
| <i>Hedeoma costatum</i> A. Gray (IV 7102)               | Poleo                | Treatment of insomnia; also ingested as a beverage like tea      | Aerial parts                                                          | Ingestion of infusion                                                                               |
| <i>Hedeoma drummondii</i> Benth. (EE 16217)             | Poleo                | Treatment of insomnia; beverage                                  | Aerial parts                                                          | Ingestion of infusion                                                                               |
| <i>Hedeoma plicatum</i> Torr. (EE 11322)                | Poleo                | Treatment of insomnia; beverage                                  | Aerial parts                                                          | Ingestion of infusion                                                                               |
| <i>Marrubium vulgare</i> Miller. L. (EE 16016)          | Marrubio             | Treatment of stomach infections<br><br>To stimulate the appetite | Aerial parts, with those of <i>Artemisia mexicana</i><br>Aerial parts | Ingestion of infusion<br><br>Ingestion of infusion                                                  |

|                                                  |             |                                                                                                                                                                                                     |                                                                                                              |                                                                                                                                                                                                                                                              |
|--------------------------------------------------|-------------|-----------------------------------------------------------------------------------------------------------------------------------------------------------------------------------------------------|--------------------------------------------------------------------------------------------------------------|--------------------------------------------------------------------------------------------------------------------------------------------------------------------------------------------------------------------------------------------------------------|
|                                                  |             | Remedy for sinus infections<br>“Satiated” infant (empachado)<br>Treatment of intestinal parasites<br>Remedy for colic<br>Treatment of allergies and skin rashes<br>“Fright” illness (mal del susto) | Leaves<br>Leaves<br>Leaves<br>Leaves<br>Leaves<br>Leaves                                                     | Infusion is applied as 2-3 nasal drops three times at day<br>Ground, mixed with maternal milk and fed to infant<br>Toasted and boiled, infusion is ingested<br>Ingestion of infusion<br>Afflicted parts are rubbed with a decoction<br>Ingestion of infusion |
| <i>Mentha piperita</i> L. (EE 16092)             | Menta       | Treatment of respiratory problems<br>Beverage<br>Remedy for colic                                                                                                                                   | Aerial parts, with <i>Agastache palmeri</i><br>Leaves<br>Leaves                                              | Ingestion of infusion<br>Ingestion of infusion<br>Ingestion of infusion                                                                                                                                                                                      |
| <i>Mentha rotundifolia</i> (L.) Huds. (EE 16073) | Mastranzo   | Abortive                                                                                                                                                                                            | Leaves, with <i>Foeniculum vulgare</i> and <i>Quercus polymorpha</i>                                         | Ingestion of infusion                                                                                                                                                                                                                                        |
| <i>Mentha spicata</i> L. (EE 16153)              | Yerba buena | Childbirth<br>Treatment of parasites<br>Remedy for stomach problems<br>Flavoring herb<br>Beverage                                                                                                   | Aerial parts<br>Leaves<br>Leaves<br>Aerial parts<br>Aerial parts, with those of <i>Matricaria chamomilla</i> | Ingestion of infusion two days after childbirth to avoid hemorrhages<br>Ingestion of infusion<br>Ingestion of infusion<br>Added to broths<br>Ingestion of infusion                                                                                           |
| <i>Ocimum basilicum</i> L. (EE 18918)            | Albácar     | Treatment of heart afflictions<br>Remedy for colic<br>Flavoring herb                                                                                                                                | Leaves<br>Aerial parts, with <i>Agastache mexicana</i><br>Aerial parts                                       | Ingestion of infusion<br>Ingestion of infusion<br>Added to broths                                                                                                                                                                                            |
| <i>Rosmarinus officinalis</i> L. (EE 16359)      | Romero      | Remedy for headaches<br>Treatment of diabetes<br>Rheumatism<br>To control blood pressure                                                                                                            | Leaves<br>Leaves<br>Leaves<br>Leaves                                                                         | Ingestion of infusion<br>Ingestion of infusion<br>Steeped in alcohol and rubbed on afflicted parts<br>Ingestion of infusion                                                                                                                                  |

|                                                   |           |                                                                                                 |                                                                                                                                                     |                                                                                                                                                              |
|---------------------------------------------------|-----------|-------------------------------------------------------------------------------------------------|-----------------------------------------------------------------------------------------------------------------------------------------------------|--------------------------------------------------------------------------------------------------------------------------------------------------------------|
| <i>Salvia ballotaeflora</i> Benth. (EE 16059)     | Salvia    | Ornamental                                                                                      | Whole plant                                                                                                                                         | Planted in home gardens                                                                                                                                      |
| <i>Salvia chia</i> Sessé & Moc. (JV 8671)         | Chía      | Ornamental                                                                                      | Whole plant                                                                                                                                         | Planted in home gardens                                                                                                                                      |
| <i>Salvia coccinea</i> Juss. ex Murr. (EE 14649)  | Betónica  | Remedy for headaches<br>To remove debris from the eyes                                          | Stems<br>Seeds                                                                                                                                      | Ingestion of infusion<br>A seed is placed on the cornea: debris sticks to the seed, which is then removed from the eye                                       |
| <i>Salvia hispanica</i> L. (EE 16742)             | Salvia    | Remedy for constipation<br>Ornamental                                                           | Seeds<br>Whole plant                                                                                                                                | Ingested like pills<br>Planted in home gardens                                                                                                               |
| <i>Salvia microphylla</i> Sessé & Moc. (EE 14830) | Mirto     | Remedy for stomachaches                                                                         | Leaves                                                                                                                                              | Ingestion of infusion                                                                                                                                        |
| <i>Salvia regla</i> Cav. (EE 19186)               | Salvia    | Treatment of anemia (to “swell” the blood)                                                      | Leaves                                                                                                                                              | Ingestion of infusion                                                                                                                                        |
| LAURACEAE                                         |           |                                                                                                 |                                                                                                                                                     |                                                                                                                                                              |
| <i>Litsea pringlei</i> Bartlett (EE 16277)        | Laurel    | Remedy for heartburn<br><br>Remedy for colic<br>Suffocation<br>Chest pain<br><br>Flavoring herb | Leaves (with <i>Persea americana</i> pit)<br>Leaves<br>Leaves<br>Leaves (with <i>Citrus aurantium</i> and <i>Ocimum basilicum</i> )<br>Aerial parts | Ingestion of infusion<br><br>Ingestion of infusion<br>Ingestion of infusion<br>Ingestion of infusion<br><br>Added to pork                                    |
| <i>Persea americana</i> Mill. (EE 16788)          | Aguacate  | Food<br>To “cleanse” the blood<br>Antihelmintic                                                 | Fruit<br>Bark<br>Fruit peel                                                                                                                         | Eaten raw<br>Ingestion of infusion<br>Eaten before breakfast                                                                                                 |
| <i>Persea pachypoda</i> Nees (EE 19707)           | Salsafrás | Treatment of anemia (to “swell” the blood)                                                      | Leaves and bark (with <i>Prunus serotina</i> )                                                                                                      | Ingestion of infusion                                                                                                                                        |
| LILIACEAE                                         |           |                                                                                                 |                                                                                                                                                     |                                                                                                                                                              |
| <i>Allium sativum</i> L. (EE 16370)               | Ajo       | Control of arterial pressure<br>Earache<br><br>Scorpion stings and insects bites                | Bulb<br>Bulb<br><br>Bulb                                                                                                                            | A piece of garlic is ingested<br>A piece of garlic is warmed up, wrapped in cotton and inserted into the ear<br>A piece of garlic is rubbed on the sore skin |

|                                                         |                  |                                                                                                                                                                                                                                                                            |                                                                                                                                                                          |                                                                                                                                                                                                                                                                                                                                                                                                                                                                                                                                                          |
|---------------------------------------------------------|------------------|----------------------------------------------------------------------------------------------------------------------------------------------------------------------------------------------------------------------------------------------------------------------------|--------------------------------------------------------------------------------------------------------------------------------------------------------------------------|----------------------------------------------------------------------------------------------------------------------------------------------------------------------------------------------------------------------------------------------------------------------------------------------------------------------------------------------------------------------------------------------------------------------------------------------------------------------------------------------------------------------------------------------------------|
|                                                         |                  | Food<br>Condiment                                                                                                                                                                                                                                                          | Bulb<br>Bulb                                                                                                                                                             | Eaten raw and cooked in<br>broths and with beans<br>Added to foods and<br>dressings                                                                                                                                                                                                                                                                                                                                                                                                                                                                      |
| <i>Aloe vera</i> L. (EE 14908)                          | Sábila           | Remedy for toothache<br><br>To heal wounds<br>Inflammation<br>Treatment of acne<br><br>Shampoo<br><br>Treatment of diabetes<br><br>Remedy for gastritis<br><br>Treatment of circulatory ailments<br><br>Treatment of cancer<br>Anemia<br>Arthritis<br>To remove skin blots | Leaves<br><br>Pulp of the leaves<br>Pulp of the leaves<br>Pulp of the leaves<br><br>Leaves<br><br>Leaves<br><br>Leaves<br><br>Raw pulp<br>Raw pulp<br>Raw pulp<br>Leaves | Wrapped in cloth, applied<br>on afflicted area<br>Applied as a poultice<br>Applied as a poultice<br>Blended and smeared on the<br>face 2-3 times a week;<br>treatment strengthens and<br>softens the skin<br>Blended in water, used as a<br>hair wash<br>Blended in water, ingested<br>before breakfast<br>Blended in water with<br>orange juice and ingested<br>Blended in water, ingested<br>before breakfast<br>Eaten before breakfast<br>Eaten before breakfast<br>Eaten before breakfast<br>The juice of the pulp is<br>applied to the stained skin |
| <i>Schoenocaulon texanum</i><br>Scheele (EE 16339)      | Cola de zorra    | Ornamental                                                                                                                                                                                                                                                                 | Whole plant                                                                                                                                                              | Planted in home gardens                                                                                                                                                                                                                                                                                                                                                                                                                                                                                                                                  |
| MALPIGHIACEAE                                           |                  |                                                                                                                                                                                                                                                                            |                                                                                                                                                                          |                                                                                                                                                                                                                                                                                                                                                                                                                                                                                                                                                          |
| <i>Mascagnia macroptera</i> Nied.<br>(EE 16201)         | Piñata           | Ornamental                                                                                                                                                                                                                                                                 | Whole plant                                                                                                                                                              | Planted in home gardens                                                                                                                                                                                                                                                                                                                                                                                                                                                                                                                                  |
| MALVACEAE                                               |                  |                                                                                                                                                                                                                                                                            |                                                                                                                                                                          |                                                                                                                                                                                                                                                                                                                                                                                                                                                                                                                                                          |
| <i>Hibiscus cardiophyllus</i> A.<br>Gray (EE 19704)     | Tulipán          | Ornamental                                                                                                                                                                                                                                                                 | Whole plant                                                                                                                                                              | Planted in home gardens                                                                                                                                                                                                                                                                                                                                                                                                                                                                                                                                  |
| <i>Hibiscus coulteri</i> Harv. ex A.<br>Gray (EE 16172) | Tulipán amarillo | Ornamental                                                                                                                                                                                                                                                                 | Whole plant                                                                                                                                                              | Planted in home gardens                                                                                                                                                                                                                                                                                                                                                                                                                                                                                                                                  |
| MIMOSACEAE                                              |                  |                                                                                                                                                                                                                                                                            |                                                                                                                                                                          |                                                                                                                                                                                                                                                                                                                                                                                                                                                                                                                                                          |

|                                                                                            |                 |                                                                                             |                                                                    |                                                                                                  |
|--------------------------------------------------------------------------------------------|-----------------|---------------------------------------------------------------------------------------------|--------------------------------------------------------------------|--------------------------------------------------------------------------------------------------|
| <i>Acacia farnesiana</i> (L.) Willd. (EE 19370)                                            | Huizache        | Fodder<br>Firewood<br>Remedy for dyspepsia<br>Treatment of dysentery<br>Vaginal hemorrhages | Leaves, fruits<br>Trunk and branches<br>Flowers<br>Fruits<br>Roots | Fed raw to animals<br><br>Ingestion of infusion<br>Boiled and ingested as infusion<br>Boiled     |
| <i>Acacia greggii</i> A. Gray. (EE 13387)                                                  | Uña de gato     | Treatment of cancer                                                                         | Aerial parts                                                       | Ingestion of infusion                                                                            |
| <i>Acacia rigidula</i> Benth. (EE 13333)                                                   | Chaparro prieto | Fodder<br>Firewood                                                                          | Leaves<br>Trunk and branches                                       | Fed raw to animals                                                                               |
| <i>Ebenopsis ebano</i> (Berland.) Barneby & J.W. Grimes (EE 16231)                         | Ébano           | Handicrafts<br>Food<br>Beverage<br><br>Carpentry                                            | Wood<br>Seeds<br>Seeds<br><br>Wood                                 | Carved<br>Boiled<br>Toasted, ground and boiled as a substitute for coffee<br>Made into furniture |
| <i>Havardia pallens</i> Britt & Rose (EE 14645)                                            | Tenaza          | Fodder<br>Construction material                                                             | Leaves<br>Trunk                                                    | Fed raw to animals<br>To build fences, roofs, walls                                              |
| <i>Leucaena greggii</i> S. Watson (EE 16104)                                               | Tepehuaje       | Fodder                                                                                      | Leaves                                                             | Fed raw to animals                                                                               |
| <i>Leucaena leucocephala</i> (Lam.) DeWit ssp. <i>glabrata</i> (Rose) S. Zárate (EE 16049) | Dormilón        | Fodder                                                                                      | Leaves                                                             | Fed raw to animals                                                                               |
| <i>Prosopis glandulosa</i> Torr. var. <i>glandulosa</i> (EE 13337)                         | Mezquite        | Fodder<br>Construction material<br>Food<br>Firewood                                         | Leaves and fruit pods<br>Trunk<br>Fruit pods<br>Trunk and branches | Fed raw to animals<br>To build fences, roofs, walls<br>Eaten raw                                 |
| MORACEAE                                                                                   |                 |                                                                                             |                                                                    |                                                                                                  |
| <i>Ficus carica</i> L. (EE 16164)                                                          | Higo            | Food                                                                                        | Infrutescence                                                      | Eaten raw or cooked and canned                                                                   |
| <i>Morus celtidifolia</i> Kunth (EE 13381)                                                 | Mora            | Treatment of diabetes<br>Food                                                               | Fruit<br>Fruit                                                     | Ingestion of decoction<br>Eaten raw                                                              |
| NOLINACEAE                                                                                 |                 |                                                                                             |                                                                    |                                                                                                  |
| <i>Dasyllirion texanum</i> Scheele (EE 16180)                                              | Sotol           | Thatching material for roofs<br>Alcoholic beverage                                          | Leaves<br>Sap                                                      | Tied into bundles<br>Fermented and distilled                                                     |
| <i>Hesperaloe funifera</i> Trel.                                                           | Sotol           | Fiber                                                                                       | Leaves                                                             | Scraped and twisted into                                                                         |

|                                                                      |            |                                                                              |                                       |                                                                        |
|----------------------------------------------------------------------|------------|------------------------------------------------------------------------------|---------------------------------------|------------------------------------------------------------------------|
| (EE 19475)                                                           |            |                                                                              |                                       | rope                                                                   |
| NYCTAGINACEAE                                                        |            |                                                                              |                                       |                                                                        |
| <i>Bougainvillea glabra</i> Choisy (EE 18934)                        | Bugambilia | Cough remedy<br>Ornamental                                                   | Bracts and flowers<br>Whole plant     | Ingestion of infusion<br>Planted in home gardens                       |
| <i>Mirabilis jalapa</i> L. (EE 16199)                                | Maravilla  | Treatment of epilepsy<br>Purgative; anticrotalic; renal and hepatic ailments | Flowers<br>Leaves                     | Ingestion of infusion<br>Ingestion of infusion                         |
| ORCHIDACEAE                                                          |            |                                                                              |                                       |                                                                        |
| <i>Corallorhiza maculata</i> Greene (EE 16262)                       | Orquídea   | Ornamental                                                                   | Whole plant                           | Planted in home gardens                                                |
| <i>Dichromanthus cinnabarinus</i> (La Llave & Lex.) Garay (EE 16488) | Orquídea   | Ornamental                                                                   | Whole plant                           | Planted in home gardens                                                |
| <i>Hexalectris revoluta</i> Correll                                  | Orquídea   | Ornamental                                                                   | Whole plant                           | Planted in home gardens                                                |
| <i>Malaxis macrostachya</i> Kuntze (EE 16698)                        | Orquídea   | Ornamental                                                                   | Whole plant                           | Planted in home gardens                                                |
| <i>Malaxis corymbosa</i> Kuntze (16640)                              | Orquídea   | Ornamental                                                                   | Whole plant                           | Planted in home gardens                                                |
| <i>Platanthera sparsiflora</i> Schltr. (EE 16302)                    | Orquídea   | Ornamental                                                                   | Whole plant                           | Planted in home gardens                                                |
| <i>Spiranthes vernalis</i> Engelm. & A. Gray (EE 16137)              | Orquídea   | Ornamental                                                                   | Whole plant                           | Planted in home gardens                                                |
| PHYTOLACCACEAE                                                       |            |                                                                              |                                       |                                                                        |
| <i>Phytolacca icosandra</i> L. (EE 16268)                            | Fitolaca   | Remedy for dandruff                                                          | Leaves                                | The hair is washed with a solution of the boiled leaves                |
| PINACEAE                                                             |            |                                                                              |                                       |                                                                        |
| <i>Pinus cembroides</i> Gordon (EE 19558)                            | Pino       | Firewood<br>Construction material                                            | Trunk and branches<br>Trunk           | Burnt in ovens<br>To build houses, fences, roofs                       |
| <i>Pinus greggii</i> Engelm. ex Parl. (EE 12731)                     | Pino       | Firewood<br>Construction material                                            | Trunk and branches<br>Trunk           | Burnt in ovens<br>To build houses, roofs, fences                       |
| <i>Pinus pseudostrobus</i> Lindl. (EE 11281)                         | Pino       | Treatment of bronchitis<br>Firewood<br>Construction material                 | Leaves<br>Trunk and branches<br>Trunk | Ingestion of infusion<br>Burnt in ovens<br>Houses, roofs, fences, etc. |
| <i>Pinus teocote</i> Cham. & Schltdl. (EE 11803)                     | Ocote      | Firewood<br>Construction material                                            | Trunk and branches<br>Trunk           | Burnt in ovens<br>Houses, roofs, fences, etc.                          |

|                                                 |                |                                                                                                                 |                                                                      |                                                                                                                                                                                              |
|-------------------------------------------------|----------------|-----------------------------------------------------------------------------------------------------------------|----------------------------------------------------------------------|----------------------------------------------------------------------------------------------------------------------------------------------------------------------------------------------|
| PLANTAGINACEAE                                  |                |                                                                                                                 |                                                                      |                                                                                                                                                                                              |
| <i>Plantago major</i> L. (EE 16190)             | Lengua de vaca | Antibiotic, antiinflammatory                                                                                    | Leaves                                                               | Boiled, ingestion of infusion                                                                                                                                                                |
| POACEAE                                         |                |                                                                                                                 |                                                                      |                                                                                                                                                                                              |
| <i>Avena sativa</i> L. (EE 16096)               | Avena          | Treatment of gastritis<br><br>Food                                                                              | Raw seeds<br><br>Seeds                                               | Soaked in water for one day, blended and ingested as a drink during 9 days<br>Made into a beverage, raw or cooked                                                                            |
| <i>Cymbopogon citratus</i> Stapf. (EE 18968)    | Zacate limón   | Beverage                                                                                                        | Leaves                                                               | Ingestion of infusion                                                                                                                                                                        |
| <i>Zea mays</i> L. (EE 16288)                   | Maíz, elote    | Food<br><br>Animal fodder<br>Treatment of cough, dysentery; bladder inflammations, diabetes and menstrual colic | Infrutescence (mazorca)<br><br>Aerial parts<br>Corn "hairs" (styles) | Made into tortillas; tender ears are boiled or roasted, tender seeds are fried (esquite), also added to soups and broths<br>Fed raw to animals<br>Ingestion of infusion, at times with honey |
| POLYGONACEAE                                    |                |                                                                                                                 |                                                                      |                                                                                                                                                                                              |
| <i>Rumex mexicanus</i> Meisn. (EE 16097)        | Acelga         | Food                                                                                                            | Tender leaves                                                        | Eaten raw in salads, boiled in soups or mixed with eggs, tomatoes and onions                                                                                                                 |
| <i>Rumex pulcher</i> L. (EE 14661)              | Lengua de vaca | Food<br><br>Treatment of vaginal infections<br><br>Fodder                                                       | Tender leaves<br><br>Leaves<br><br>Aerial parts                      | Eaten raw in salads, boiled in soups or mixed with eggs, tomatoes and onions<br>Infusion ingested and applied as a vaginal wash<br>Fed raw to animals                                        |
| PORTULACACEAE                                   |                |                                                                                                                 |                                                                      |                                                                                                                                                                                              |
| <i>Portulaca oleracea</i> L. (EE 16699)         | Verdolaga      | Food                                                                                                            | Aerial parts                                                         | Eaten raw in salads and cooked                                                                                                                                                               |
| PTERIDACEAE                                     |                |                                                                                                                 |                                                                      |                                                                                                                                                                                              |
| <i>Pteridium aquilinum</i> (L.) Kuhn (EE 16181) | Zarzaparrilla  | Remedy for colic                                                                                                | Roots                                                                | Ingestion of infusion                                                                                                                                                                        |
| PUNICACEAE                                      |                |                                                                                                                 |                                                                      |                                                                                                                                                                                              |

|                                                                   |                 |                                                                  |                                                         |                                                                                                  |
|-------------------------------------------------------------------|-----------------|------------------------------------------------------------------|---------------------------------------------------------|--------------------------------------------------------------------------------------------------|
| <i>Punica granatum</i> L. (EE 11211)                              | Granada         | Food<br>Remedy for diarrhea                                      | Fruits<br>Flowers (with <i>Psidium guajava</i> flowers) | Eaten raw<br>Ingestion of infusion                                                               |
| RANUNCULACEAE                                                     |                 |                                                                  |                                                         |                                                                                                  |
| <i>Clematis dioica</i> L. (EE 16441)                              | Barba de chivo  | Pain relief for toothache                                        | Stem                                                    | A piece of raw stem is applied to the afflicted area                                             |
| <i>Clematis drummondii</i> Torr. & A. Gray (EE 14420)             | Barba de chivo  | Toothache                                                        | Stem                                                    | A piece of raw stem is applied locally                                                           |
| ROSACEAE                                                          |                 |                                                                  |                                                         |                                                                                                  |
| <i>Cowania plicata</i> D. Don (EE 12733)                          | Alejandría      | Remedy for colic and stomachaches                                | Leaves                                                  | Ingestion of infusion                                                                            |
| <i>Crataegus tracyi</i> Ashe (EE 16054)                           | Tejocote        | Food<br><br>Treatment of diabetes                                | Fruit<br><br>Fruit peel                                 | Eaten raw or cooked and canned<br>Ingestion of infusion                                          |
| <i>Eriobotrya japonica</i> (Thunb.) Lindl. (EE 10911)             | Níspero         | Remedy for colic                                                 | Leaves and fruit peel                                   | Ingestion of infusion                                                                            |
| <i>Fragaria mexicana</i> Schltld. (EE 14671)                      | Fresa silvestre | Food                                                             | Fruit                                                   | Eaten raw                                                                                        |
| <i>Malus domestica</i> Borkh. (EE 11466)                          | Manzana         | Food                                                             | Fruit                                                   | Eaten raw or cooked and canned; also made into cider                                             |
| <i>Prunus domestica</i> L. (EE 16165)                             | Ciruelo         | Food                                                             | Fruit                                                   | Eaten raw or cooked and canned                                                                   |
| <i>Prunus persica</i> (L.) Batsch (EE 19249)                      | Durazno         | To remove intestinal parasites<br>Food                           | Leaves<br>Fruit                                         | Ingestion of infusion<br>Eaten raw or cooked and canned                                          |
| <i>Prunus serotina</i> Poir. (EE 16515)                           | Capulín, quina  | Treatment of anemia<br>Abortive<br>Liqueur                       | Bark<br>Leaves and bark<br>Fruit                        | Ingestion of infusion<br>Ingestion of infusion<br>Fermented                                      |
| <i>Rosa serrulata</i> Raf. (EE 16133)                             | Rosa            | Remedy for constipation<br>Colic<br>Diarrhea<br>To stop vomiting | Flowers<br>Flowers<br>Flowers<br>Flowers                | Ingestion of infusion<br>Ingestion of infusion<br>Ingestion of infusion<br>Ingestion of infusion |
| <i>Vauquelinia corymbosa</i> Correa ex Humbl. & Bonpl. (EE 12739) | Saucillo        | Ornamental                                                       | Whole plant                                             | Planted in home gardens                                                                          |
| RUBIACEAE                                                         |                 |                                                                  |                                                         |                                                                                                  |

|                                                                      |                     |                                                                     |                                                                                                                                |                                                                                                                                                   |
|----------------------------------------------------------------------|---------------------|---------------------------------------------------------------------|--------------------------------------------------------------------------------------------------------------------------------|---------------------------------------------------------------------------------------------------------------------------------------------------|
| <i>Cephalanthus salicifolius</i> Humbl. & Bonpl. (EE 16572)          | Sauz                | Laxative<br>Treatment of venereal diseases                          | Leaves<br>Bark                                                                                                                 | Boiled, ingestion of infusion<br>Ingestion of infusion                                                                                            |
| <i>Chiococca alba</i> Rusby (JV 8674)                                | Perlas de la Virgen | Remedy for stomachaches, renal pains, diabetes                      | Leaves                                                                                                                         | Ingestion of infusion                                                                                                                             |
| RUTACEAE                                                             |                     |                                                                     |                                                                                                                                |                                                                                                                                                   |
| <i>Casimiroa greggii</i> (S. Watson) F. Chiang (EE 16211)            | Manguito            | To control arterial pressure                                        | Leaves                                                                                                                         | Ingestion of infusion                                                                                                                             |
| <i>Esenbeckia berlandieri</i> Baill. (EE 16259)                      | Manguito            | Ornamental                                                          | Whole plant                                                                                                                    | Planted in home gardens                                                                                                                           |
| <i>Helietta parvifolia</i> Benth. (EE 16253)                         | Barreta             | Firewood<br>Construction material<br>Treatment of rheumatism        | Trunk and branches<br>Trunk<br>Leaves                                                                                          | Burnt in ovens<br>To build houses, roofs, fences<br>Ingestion of infusion                                                                         |
| <i>Ruta graveolens</i> L. (EE 16015)                                 | Ruda                | Remedy for chest pains<br>Earaches<br><br>Headaches<br><br>Abortive | Leaves<br>Leaves<br><br>Leaves (with oil)<br><br>Leaves (with 9 seeds of <i>Phaseolus vulgaris</i> and <i>Bidens odorata</i> ) | Ingestion of infusion<br>Raw leaves are crushed and inserted into the ear<br>Leaves are adhered to the sides of the head<br>Ingestion of infusion |
| SAPINDACEAE                                                          |                     |                                                                     |                                                                                                                                |                                                                                                                                                   |
| <i>Dodonaea viscosa</i> Mart. (EE 13304)                             | jara                | Remedy for colic; treatment for sterility                           | All parts                                                                                                                      | Boiled and ingested                                                                                                                               |
| SAXIFRAGACEAE                                                        |                     |                                                                     |                                                                                                                                |                                                                                                                                                   |
| <i>Heuchera mexicana</i> W. Schaffn. (EE 16108)                      | Saxifraga           | Ornamental                                                          | Whole plant                                                                                                                    | Planted in home gardens                                                                                                                           |
| SELAGINELLACEAE                                                      |                     |                                                                     |                                                                                                                                |                                                                                                                                                   |
| <i>Selaginella lepidophylla</i> (Hook. et A. Gray) Spring (EE 16688) | Siempre viva        | Treatment of renal ailments, diarrhea, bronchitis                   | Leaves                                                                                                                         | Ingestion of infusion                                                                                                                             |
| <i>Selaginella pilifera</i> A. Br. (EE 16273)                        | Siempre viva        | Treatment of renal ailments                                         | Leaves                                                                                                                         | Ingestion of infusion                                                                                                                             |
| SMILACACEAE                                                          |                     |                                                                     |                                                                                                                                |                                                                                                                                                   |

|                                                            |               |                                                                                          |                                                                                                                      |                                                                                                    |
|------------------------------------------------------------|---------------|------------------------------------------------------------------------------------------|----------------------------------------------------------------------------------------------------------------------|----------------------------------------------------------------------------------------------------|
| <i>Smilax bona-nox</i> L. (EE 16233)                       | Zarzaparrilla | To lose weight<br>Treatment of circulatory problems, anemia, renal ailments<br>Dysentery | Roots<br>Leaves                                                                                                      | Ingestion of infusion<br>Ingestion of infusion                                                     |
| <i>Smilax moranensis</i> M. Martens & Galeotti. (EE 19341) | Cocolmeca     | Remedy for renal pain                                                                    | Roots<br>Roots                                                                                                       | Ingestion of infusion<br>Ingestion of infusion                                                     |
| SOLANACEAE                                                 |               |                                                                                          |                                                                                                                      |                                                                                                    |
| <i>Datura stramonium</i> Wall. (EE 16776)                  | Toloache      | Treatment of wounds                                                                      | Leaves                                                                                                               | Applied with oil as a poultice                                                                     |
| <i>Lycopersicon esculentum</i> Mill. (EE 12981).           | Tomate        | Food<br>Remedy for cramps                                                                | Fruit<br>Fruit peel                                                                                                  | Raw edible<br>Boiled, ingestion of infusion                                                        |
| <i>Nicandra physaloides</i> Gaertn. (EE 19429)             | Belladona     | Treatment of urinary problems of livestock                                               | Leaves                                                                                                               | Boiled in 2-3 liters of water and given to animals to drink                                        |
| <i>Physalis pringlei</i> Greenm. (EE 19225)                | Tomatillo     | Remedy for cramps<br>Food                                                                | Fruit husk<br>Fruit                                                                                                  | Ingestion of infusion<br>Eaten raw or cooked in sauces                                             |
| <i>Physalis stapelioides</i> (Regel) Bitter. (EE 16351)    | Tomatillo     | Food                                                                                     | Fruit                                                                                                                | Eaten raw or cooked in sauces                                                                      |
| <i>Solanum erianthum</i> D. Don (EE 16234)                 | Malabar       | Treatment of diabetes                                                                    | Leaves                                                                                                               | Ingestion of infusion                                                                              |
| TAXACEAE                                                   |               |                                                                                          |                                                                                                                      |                                                                                                    |
| <i>Taxus globosa</i> Schltdl., (EE 19436)                  | Chiper        | Firewood<br>Construction material<br>Remedy for stomachaches<br>Headaches                | Trunk and branches<br>Trunk<br>Leaves<br>Leaves (with <i>Taraxacum officinale</i> and <i>Ruta graveolens</i> leaves) | Burnt in ovens<br>To build houses, roofs, fences<br>Ingestion of infusion<br>Ingestion of infusion |
| TAXODIACEAE                                                |               |                                                                                          |                                                                                                                      |                                                                                                    |
| <i>Taxodium mucronatum</i> Ten. (EE 16299)                 | Sabino        | Remedy for diarrhea<br>Construction material                                             | Leaves<br>Trunk and branches                                                                                         | Ingestion of infusion<br>To build houses, fences                                                   |
| UMBELLIFERAE                                               |               |                                                                                          |                                                                                                                      |                                                                                                    |
| <i>Foeniculum vulgare</i> Mill. (EE 13093)                 | Hinojo        | Remedy for colic                                                                         | Leaves                                                                                                               | Ingestion of infusion                                                                              |

|                                                   |             |                                                                                                                |                                                                                                                                     |                                                                                                                                    |
|---------------------------------------------------|-------------|----------------------------------------------------------------------------------------------------------------|-------------------------------------------------------------------------------------------------------------------------------------|------------------------------------------------------------------------------------------------------------------------------------|
| VERBENACEAE                                       |             |                                                                                                                |                                                                                                                                     |                                                                                                                                    |
| <i>Glandularia bipinnatifida</i> Nutt. (EE 16011) | Verbena     | Treatment of boils                                                                                             | Aerial parts, applied to the afflicted area                                                                                         | Infusion                                                                                                                           |
| <i>Lantana camara</i> L. (EE 14885)               | Mejorana    | Ornamental                                                                                                     | Whole plant                                                                                                                         | Planted in home gardens                                                                                                            |
| <i>Lantana macropoda</i> Torr. (EE 16218)         | Mejorana    | Remedy for stomachaches<br>Back pain<br><br>Treatment of amoebic dysentery<br>Remedy for toothache<br>Diuretic | Leaves<br>Leaves (with <i>Scutellaria microphylla</i> and <i>Bidens odorata</i> )<br>Roots and leaves<br>Roots and leaves<br>Leaves | Ingestion of infusion<br>Ingestion of infusion<br><br>Infusion ingested as a tea<br>Ingestion of infusion<br>Ingestion of infusion |
| VITACEAE                                          |             |                                                                                                                |                                                                                                                                     |                                                                                                                                    |
| <i>Vitis berlandieri</i> Planch. (EE 16364)       | Parra       | Remedy for colic<br>Treatment of eye infections                                                                | Stems and leaves<br>Leaves                                                                                                          | Ingestion of infusion<br>Infusion applied as eye drops                                                                             |
| ZYGOPHYLLACEAE                                    |             |                                                                                                                |                                                                                                                                     |                                                                                                                                    |
| <i>Larrea tridentata</i> Coult. (EE 18456)        | Gobernadora | Treatment of renal ailments<br>Digestive disorders                                                             | Leaves<br>Leaves                                                                                                                    | Ingestion of infusion<br>Ingestion of infusion                                                                                     |
